# Supplementary material
Source: publisher figshare collection journal article supplement (https://acs.figshare.com/ndownloader/files/13025486)
Supplement: Supplementary file 1 [file 13025486]

# Synthesis of ethylene glycol from syngas via oxidative double carbonylation of ethanol to diethyl oxalate and its subsequent hydrogenation

Anilkumar Satapathy,<sup>[a,b]</sup> Sandip T. Gadge<sup>[a]</sup> and Bhalchandra M. Bhanage<sup>\*[a]</sup>

<sup>a</sup>Department of Chemistry, Institute of Chemical Technology, N. Parekh Marg, Matunga, Mumbai-400019, India. Tel.: +91-2233612603 Fax: +912222692102

<sup>b</sup>Reliance Industries limited, Patalganga, Rasayani, Raigad, Maharashtra 410 220 India.  
Email: bm.bhanage@gmail.com, bm.bhanage@ictmumbai.edu.in

## Supporting Information

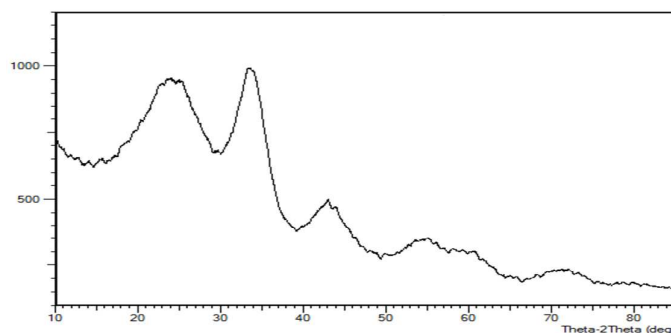

Figure S1: XRD of fresh Pd/C catalyst.

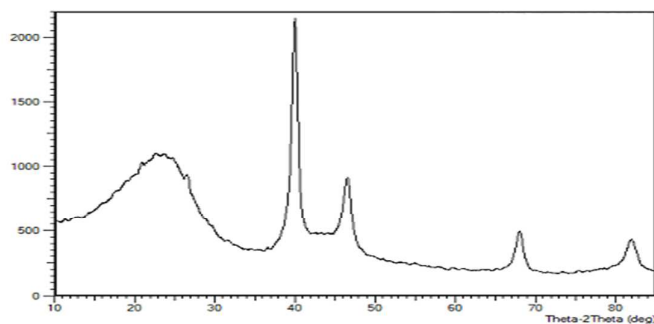

Figure S2: XRD of 1<sup>st</sup> recycled Pd/C catalyst.

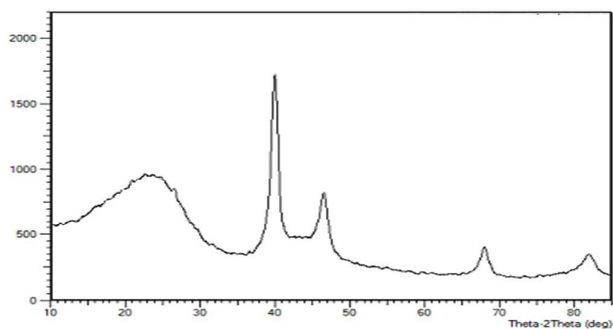

Figure S3: XRD of 4<sup>th</sup> recycled Pd/C catalyst.

Structural changes of fresh ,1<sup>st</sup> and 4<sup>th</sup> recycled Pd/C catalyst was studied by X-ray diffraction (XRD). The XRD pattern showed the, diffracted peaks for the Pd/C catalyst and no significant structural change found in fresh and recycled catalyst.

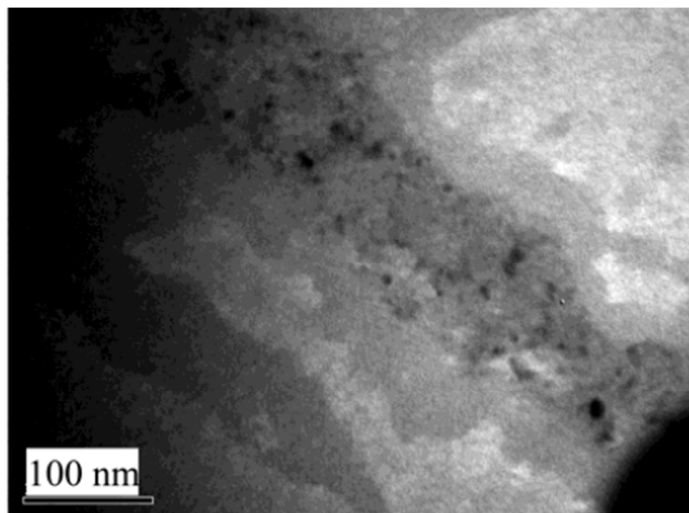

**Figure S4: TEM image of Fresh Pd/C catalyst**

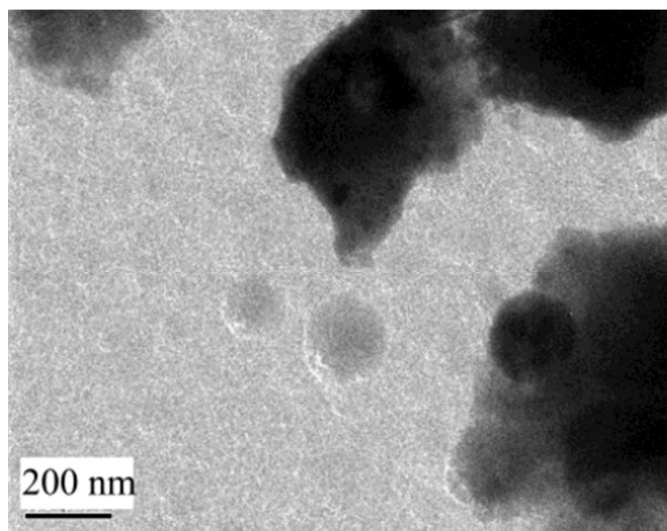

**Figure S5: TEM image of 4<sup>th</sup> recycled Pd/C catalyst**

The TEM analysis showed that the components of the Pd uniformly distributed over the carbon surface and no agglomeration happen.
